# Supplementary material
Source: PubMed Central journal article supplement (PMC3225267)
Supplement: supp_124.22.3784_JCS080200TableS1.pdf [file supp_124.22.3784_JCS080200TableS1.pdf]

### **Ultrastructural characterization of myelinating cocultures abnormalities**

|                                              | <b>shCTRL</b> | <b>shMLCK</b>         |
|----------------------------------------------|---------------|-----------------------|
| <b>Total # of myelin profiles</b>            | 60            | 31 <sup>+</sup>       |
| Normal profiles                              | 49 (82%)      | 17 (55%)              |
| Abnormal profiles                            | 11 (18%)      | 14 (45%) <sup>¶</sup> |
| <b>Inclusion bodies and/or myelin ovoids</b> | 6 (10%)       | 5 (16%)               |
| <b>Outpocketing and/or myelin whorls</b>     | 7 (12%)       | 6 (19%)               |
| <b>Compaction defects*</b>                   | 0 (0%)        | 5 (16%)               |
| <b>Thin or uneven myelin*</b>                | 2 (3%)        | 7 (23%)               |
| <b>SC with swollen ER*</b>                   | 1(2%)         | 4 (7%)                |

A total of 55 (shCTRL) and 74 (shMLCK) high magnification fields (10,500X) were scored for the presence of myelin. Cultures treated with shMLCK had significantly less myelinated axons (+) with a larger proportion of them exhibiting various morphological defects (¶). Some abnormalities (\*) such as thin myelin and swollen ER were more commonly found in shMLCK cultures, while compaction defects were seen only in shMLCK-treated cultures.
